# Supplementary material for: A streamlined pipeline for multiplexed quantitative site-specific N-glycoproteomics
Source: Nat Commun. 2020 Oct 19;11:5268. doi: 10.1038/s41467-020-19052-w (PMC7572468; doi:10.1038/s41467-020-19052-w)
Supplement: Supplementary file 8 — Supplementary Data 5 [file 41467_2020_19052_MOESM8_ESM.xlsx]

## Sheet: Sheet description
Data sheet/column	Description
Anotation of proteins	The functional annotations of 2FF-affected glycoproteins via surveying literature relevant to the respective gene and protein names (including alternative names) and keywords of “cancer”, “lymphoma” or “B cell”
Genes	Gene name of 2FF-affected glycoproteins
Remarks	Key findings that are relevent to the glycoproteins
PMID	The PubMed IDs of relevent publications
Additional notes	Summarized information about the biological function
Sunburst	A summarized table used for making the Sunburst plot (Fig. 5A). We summarized the information about the biological function(s) and subcellular localization of all proteins and classified them accordingly into multiple categories. For example, the first inner layer contains the groups of lymphoma-related, drug target in other cancer, enzymes and others. The number of proteins in each category is p…

## Sheet: Anotation of proteins
Genes	Remarks	PMID	Additional notes
CD22 (Siglec-2)	Overexpressed in lymphomas; inhibitory regulation; B-cell trafficking and distribution regulation	25234143 and 17380156 (Review); 17728258; 15886119; 15364057; 12493916; 17312134; 7618087; 10224292	Lymphoma-related	Drug target
	Anti-CD22 and anti-CD79B antibody drug conjugates are active in different molecular diffuse large B-cell lymphoma subtypes; target for treatment of non-Hodgkin's lymphoma, ALL, lymphoma	25708834; 20596033; 21077738; 19258515; 27292104
CD79B	molecular driver of lymphomas (e.g.activated B-cell-like (ABC) diffuse large B-cell lymphomas (DLBCL) - chronic active BCR signaling resulting in constitutive activation of the NF-κB pathway)	24060900	Lymphoma-related	Molecular driver
PTPRC (CD45)	C77G in PTPRC (CD45) is no risk allele for ovarian cancer, but associated with less aggressive disease.	28759630	Lymphoma-related	Molecular marker
	The CD45 isoform B220 identifies select subsets of human B cells and B-cell lymphoproliferative disorder: marginal zone lymphoma, follicular lymphoma, and lymphoplasmacytic lymphoma.	15712182
	PTPRG and PTPRC modulate nilotinib response in chronic myeloid leukemia cells.	29507701
	Differential representation of B cell subsets in mixed bone marrow chimera mice due to expression of allelic variants of CD45 (CD45.1/CD45.2).	23928494
	Mutation of the receptor tyrosine phosphatase PTPRC (CD45) in T-cell acute lymphoblastic leukemia.	22438252
	High CD45 surface expression determines relapse risk in children with precursor B-cell and T-cell acute lymphoblastic leukemia treated according to the ALL-BFM 2000 protocol.	23911702
	Genome-wide mouse mutagenesis reveals CD45-mediated T cell function as critical in protective immunity to HSV-1.	24068938
	Galectin-3 binds to CD45 on diffuse large B-cell lymphoma cells to regulate susceptibility to cell death.	23065155
	CD45 expression in low-grade B-cell non-Hodgkin's lymphomas.	17692374
	T-cell-independent antiviral B cell responses in CD45-deficient mice.	9015183
	CD45 links the B cell receptor with cell survival and is required for the persistence of germinal centers.	16378097
	Quantitative differences in CD45 expression unmask functions for CD45 in B-cell development, tolerance, and survival.	22135465
	Regulation of B-cell activation by CD45: a question of mechanism.	7945781
	Administration of anti-CD45 mAb specific for a B cell-restricted epitope abrogates the B cellresponse to a T-dependent antigen in vivo.	7504011
	Human B cells express a CD45 isoform that is similar to murine B220 and is downregulated with acquisition of the memory B-cell marker CD27.	12500291
	Expression of different CD45 isoforms by subpopulations of activated B cells.	1388188
	The role of the protein tyrosine phosphatase CD45 in regulation of B lymphocyte activation.	11913947
	T-helper signals restore B-cell receptor signaling in autoreactive anergic B cells by upregulating CD45 phosphatase activity.	27056269
	Adult pre B-cell acute lymphoblastic leukemia with unusually large proportion of bone marrow CD45 bright/high SSc blasts.	26415521
	CD45+ and CD45- lymphocyte populations identified by flow cytometry from dogs with lymphoma exhibit similar morphology and the same clonal (B cell or T cell) lineage.	26553299
	Epstein-Barr Virus-Positive CD20- and CD45-Negative Diffuse Large B-Cell Lymphoma: A Diagnostic Challenge.	29968492
	An extracatalytic function of CD45 in B cells is mediated by CD22.	26561584
	High CD45 surface expression determines relapse risk in children with precursor B-cell and T-cell acute lymphoblastic leukemia treated according to the ALL-BFM 2000 protocol.	23911702
	B-cell depletion improves islet allograft survival with anti-CD45RB.	23192154
IGHM and JCHAIN	B-cell antigen receptor (BCR) expression is indispensable for survival of most B-cell malignancies. the BCR in chronic lymphocytic leukemia (CLL) carries high-mannose oligosaccharides, albeit in the heavy chain constant rather than variable region. The high expression level of the unique glycoform, particularly in the more aggressive unmutated CLL subset, suggests a functional significance for th…	28824637; 26272216; 26194765	Lymphoma-related	Molecular marker
CD97	Associated with inflammation; importance of N-glycosylation for autoproteolysis; CD55 is cellular ligand	8955192; 19737555; 9064337 and 9603477 and 11297558	Lymphoma-related	Molecular marker
	neutrophil migration; interacts with glycosaminoglycan chondroitin sulfate (CS)	14707087; 15498814
	Characterization	7636245
	Tumor aggressiveness in hepatocellular carcinoma	29704239
	Identification of ADGRE5 as discriminating MYC target between Burkitt lymphoma and diffuse large B-cell lymphoma.	30953469
	Leukemia surfaceome analysis reveals new disease-associated features.	23649467
	CD97, an adhesion receptor on inflammatory cells, stimulates angiogenesis through binding integrin counterreceptors on endothelial cells.	15576472
	The EGF-TM7 family: unusual structures at the leukocyte surface.	9500513
	Detection of minimal residual disease in childhood B-acute lymphoblastic leukemia by 4-color flowcytometry.	28324281
	New markers for minimal residual disease detection in acute lymphoblastic leukemia.	21487112
CD63 (Lamp-3)	on surface of extracellular vesicles, role in packaging of LMP1 exosomes in EBV, but also enriched in endosomes and lysosomes, exosome marker	27974566, 24952935, 29967128	Lymphoma-related	Disease marker
	Disease marker in Burkitt's lymphoma (has high expression profile)	9737661
			Lymphoma-related	Drug target
CD37	target in B cell lymphomas via CART	30089630
	diffuse B cell lymphoma role	31366619; 31309259; 30979721; 30293139; 28034866; 27760757
	has a protective role against B cell lymphoma	26784544
	glycosylated protein	3257508
	detected in Burkitt's lymphoma	2210691
CD74	CD74 and intratumoral immune response in breast cancer.	27058619	Lymphoma-related	Drug target
	Oncogenic Fusion Gene CD74-NRG1 Confers Cancer Stem Cell-like Properties in Lung Cancerthrough a IGF2 Autocrine/Paracrine Circuit.	26837769
	CD74-NRG1 fusions in lung adenocarcinoma.	24469108
	Measurements of heterotypic associations between cluster of differentiation CD74 and CD44 in human breast cancer-derived cells.	29190904
	CD74 interacts with CD44 and enhances tumorigenesis and metastasis via RHOA-mediated cofilin phosphorylation in human breast cancer cells.	27626171
	Expression of CD74 in bladder cancer and its suppression in association with cancer proliferation, invasion and angiogenesis in HT-1376 cells.	29731899
	CD74 expression and its therapeutic potential in thyroid carcinoma.	25600560
	CD74 interferes with the expression of fas receptor on the surface of lymphoma cells.	25304249
	LGALS3 is connected to CD74 in a previously unknown protein network that is associated with poor survival in patients with AML.	31105032
	The combination of milatuzumab, a humanized anti-CD74 antibody, and veltuzumab, a humanized anti-CD20 antibody, demonstrates activity in patients with relapsed and refractory B-cell non-Hodgkin lymphoma.	25847298
	High frequency of CD74 expression in lymphomas: implications for targeted therapy using a novel anti-CD74-drug conjugate.	30191677
	Phase I study of the anti-CD74 monoclonal antibody milatuzumab (hLL1) in patients with previously treated B-cell lymphomas.	25754579
	Milatuzumab-conjugated liposomes as targeted dexamethasone carriers for therapeutic delivery in CD74+ B-cell malignancies.	23209030
	CD74: a new candidate target for the immunotherapy of B-cell neoplasms.	17875789
	FTY720 increases CD74 expression and sensitizes mantle cell lymphoma cells to milatuzumab-mediated cell death.	22042694
	A retroviral mutagenesis screen identifies Cd74 as a common insertion site in murine B-lymphomas and reveals the existence of a novel IFNgamma-inducible Cd74 isoform.	20416035
	Effective therapy of human lymphoma xenografts with a novel recombinant ribonuclease/anti-CD74humanized IgG4 antibody immunotoxin.	16109781
			Lymphoma-related	Drug target
CD70	CD70: An emerging target in cancer immunotherapy.	26213107
	CD70 and PD-L1 in anaplastic thyroid cancer - promising targets for immunotherapy.	28383817
	Targeting the T-cell co-stimulatory CD27/CD70 pathway in cancer immunotherapy: rationale and potential.	26098609
	CD70 turns on NK cells to attack lymphoma.	28729334
	CD70 reverse signaling enhances NK cell function and immunosurveillance in CD27-expressing B-cell malignancies.	28495792
	Combined immunodeficiency and Epstein-Barr virus-induced B cell malignancy in humans with inherited CD70 deficiency.	28011864
	Clinical significance of CD70 expression on T cells in human T-lymphotropic virus type-1 carriers and adult T cell leukemia/ lymphoma patients.	26077361
	TGF-β upregulates CD70 expression and induces exhaustion of effector memory T cells in B-cell non-Hodgkin's lymphoma.	24569779
	A phase 1 trial of SGN-CD70A in patients with CD70-positive diffuse large B cell lymphoma and mantle cell lymphoma.	30132271
	Expression of CD70 in nasal natural killer/T cell lymphoma cell lines and patients; its role for cell proliferation through binding to soluble CD27.	23206232
	Anti-CD70 antibodies: a potential treatment for EBV+ CD70-expressing lymphomas.	16373719
	CD70+ non-Hodgkin lymphoma B cells induce Foxp3 expression and regulatory function in intratumoral CD4+CD25 T cells.	17615291
	The costimulatory molecule CD70 is regulated by distinct molecular mechanisms and is associated with overall survival in diffuse large B-cell lymphoma.	23716461
	Proliferation response of leukemic cells to CD70 ligation oscillates with recurrent remission and relapse in a low-grade lymphoma.	16272354
CD40	Anti-CD40-mediated cancer immunotherapy	24555495; 27927088; 25651948	Lymphoma-related	Drug target
	CD40-mediated apoptosis in human follicular lymphoma cells.	28610909
	CD40-activated B cells induce anti-tumor immunity in vivo.	26934557
	B-cell expansion and lymphomagenesis induced by chronic CD40 signaling is strictly dependent on CD19: CD19 and PI3K-dependent activation of ERK signalling. CD19-dependence of lymphomagenesis	24938766
	ERK pathway activation to induce IgG secretion, but not essential for B cell proliferation	12881420
	Receptor for TNFSF5/CD40LG (cytokine)
CD47	Cancer immunotherapy targeting the CD47/SIRPα axis.	28286286	Lymphoma-related	Drug target
	MYC regulates the antitumor immune response through CD47 and PD-L1.	26966191
	A bispecific antibody targeting CD47 and CD20 selectively binds and eliminates dual antigenexpressing lymphoma cells.	26083076
	Targeting CD47 as a cancer therapeutic strategy: the cutaneous T-cell lymphoma experience.	29994903
	TTI-621 (SIRPαFc): A CD47-Blocking Innate Immune Checkpoint Inhibitor with Broad Antitumor Activity and Minimal Erythrocyte Binding.	27856600
	Anti-CD47 antibody synergizes with rituximab to promote phagocytosis and eradicate non-Hodgkin lymphoma.	20813259
	Targeting the CD47-SIRPα signaling axis: current studies on B-cell lymphoma immunotherapy.	30226089
	Extranodal dissemination of non-Hodgkin lymphoma requires CD47 and is inhibited by anti-CD47antibody therapy.	21828138
	CD47 Blockade by Hu5F9-G4 and Rituximab in Non-Hodgkin's Lymphoma.	30380386
	Efficacy of anti-CD47 antibody-mediated phagocytosis with macrophages against primary effusion lymphoma.	24726056
ALCAM (CD166)	significantly elevated levels in patient of Hodgkin lymphoma (HL) plasma compared with healthy controls.	18070985	Lymphoma-related
	Prognostic Significance of Activated Leukocyte Cell Adhesion Molecule (ALCAM) in Association with Promoter Methylation of the ALCAM Gene in Breast Cancer.	29315254
	Shed urinary ALCAM is an independent prognostic biomarker of three-year overall survival after cystectomy in patients with bladder cancer.	27894096
	ALCAM/CD166 is a TGF-β-responsive marker and functional regulator of prostate cancer metastasis to bone.	24385212
	level of ALCAM transcripts was associated with the inflammatory markers in breast cancer. Our results suggest that the methylation of the ALCAM gene contributes to the decreased expression of ALCAM. Also, ALCAM is linked to the inflammatory response in breast cancer.	29315254
	shed ALCAM may be a novel prognostic biomarker in bladder cancer	27894096
	Activated leukocyte cell adhesion molecule (ALCAM) is a marker of recurrence and promotes cell migration, invasion, and metastasis in early-stage endometrioid endometrial cancer.	27873306; 29682175
	Expression of ALCAM (CD166) and PD-L1 (CD274) independently predicts shorter survival in malignant pleural mesothelioma	28811252;
	Meta-analysis indicating that high ALCAM expression predicts poor prognosis in colorectal cancer.	28537909
	ALCAM (CD166) expression and serum levels are markers for poor survival of esophageal cancer patients.	21858815
	Glycosylation-dependent binding of galectin-8 to activated leukocyte cell adhesion molecule (ALCAM/CD166) is associated with cancer	27130882; 30905597
	target of cancer treatment	27208904; 20635083; 26573198
	Enhanced down-regulation of ALCAM/CD166 in African-American Breast Cancer.	25255861
	Stromal Expression of Activated Leukocyte Cell Adhesion Molecule Promotes Lung Tumor Growth and Metastasis.
CD53	CD53 antigen and epidermal growth factor induce similar changes in the pattern of phorbol ester binding in a B cell lymphom: involved in PKC-dependent signalling pathway activation in B-cell Lymphoma	8612282	Lymphoma-related
	Supramolecular complexes of MHC class I, MHC class II, CD20, and tetraspan molecules (CD53, CD81, and CD82) at the surface of a B cell line JY.	8816400
ICAM1 (CD54)	T-lymphoblastic lymphoma cells express high levels of ICAM1, leading to a blockade of tumor cell intravasation.	27894096	Lymphoma-related	Drug target
	Neutrophils protect lymphoma cells against cytotoxic and targeted therapies through CD11b/ICAM-1 binding.	29069828
	Resistance of ICAM-1-deficient mice to metastasis overcome by increased aggressiveness of lymphoma cells.	10607718
	Expression of the adhesion molecule ICAM-1 in non-Hodgkin's lymphoma: relationship with tumor dissemination and prognostic importance.	9440720
	Therapy tager and prognosis marker	26571024 ( Esophageal Squamous Cell Carcinoma) ; 29025766 (Advanced Human Thyroid Tumors) ;30119270 (thyroid cancer); 24535541 (lear cell renal cell carcinoma)
	Dissemination of T cell lymphoma to target organs: a post-homing event implicating ICAM-1 and matrix metalloproteinases.	10350332
ICAM3(CD50)	Diagnostic Markers for lymphoma	29950528 (Hodgkin Lymphoma and Systemic Anaplastic Large Cell Lymphoma) ; 16610000 (rimary non-Hodgkin's gastric lymphoma)	Lymphoma-related	Diagnostic Markers
	ICAM3 mediates inflammatory signaling to promote cancer cell stemness.	29477378
PRNP(CD230)	Cellular Prion Protein PrPC and Ecto-5'-Nucleotidase Are Markers of the Cellular Stress Response to Aneuploidy.	28377454		molecular marker
ITGAL (CD11a)	Integrin ITGAL/ITGB2 is a receptor for ICAM1, ICAM2, ICAM3 and ICAM4. Integrin ITGAL/ITGB2 is a receptor for F11R	11812992, 15528364	Lymphoma-related
	Required for generation of common lymphoid progenitor cells in bone marrow, indicating the role in lymphopoiesis	25108025
	Absence, or low expression, of leukocyte adhesion molecules CD11 and CD18 on Burkitt lymphoma cells	2897343
ITGB2 (CD18)	Integrin ITGAL/ITGB2 is a receptor for ICAM1, ICAM2, ICAM3 and ICAM4. Integrin ITGAL/ITGB2 is a receptor for F11R		Lymphoma-related	prognosis
	Failure of a CD18/anti-LFA1 monoclonal antibody infusion to prevent graft rejection in leukemic patients receiving T-depleted allogeneic bone marrow transplantation.	2564220
	Expression of CD18 (integrin beta 2 chain) correlates with prognosis in malignant B cell lymphomas.	8097923
	Expression of the leucocyte integrin LFA-1 (CD11a/CD18) and its ligand ICAM-1 (CD54) in lymphoid malignancies is related to lineage derivation and stage of differentiation but not to tumor grade.	1683677
	Blocking lymphoma invasiveness with a monoclonal antibody directed against the beta-chain of the leukocyte adhesion molecule (CD18).	8097756
	Absence, or low expression, of leukocyte adhesion molecules CD11 and CD18 on Burkitt lymphoma cells.	2897343
	Expression of adhesion molecules CD11/CD18 (Leu-CAMs, beta 2-integrins), CD54 (ICAM-1) and CD58 (LFA-3) in B-chronic lymphocytic leukemia.	7519509
	Expression of the leucocyte integrin LFA-1 (CD11a/CD18) and its ligand ICAM-1 (CD54) in lymphoid malignancies is related to lineage derivation and stage of differentiation but not to tumor grade.	1683677
	PSGL-1/selectin and ICAM-1/CD18 interactions are involved in macrophage-induced drug resistance in myeloma.	22996336
ITGB1 (CD29)	Expression of CD29 on lymphoma cells and/or CD36 on microvascular endothels correlates with high serum LDH level in diffuse large B-cell lymphomas (DLBCLs) and is frequent in de novo CD5-positive DLBCLs.	16211218	Lymphoma-related
	IL1 signaling ins involved in tumorogenesis	17043764
	Integrins are a family of cell adhesion receptors that recognize extracellular matrix ligands and cell surface ligands; Fractalkine is a chemokine on endothelial cells which plays role in leukocyte trafficking.; ITGA5:ITGB1 is a receptor for IL1B and binding is essential for IL1B signaling	29030430
ITGB7	an adhesion molecule that mediates lymphocyte migration and homing to gut-associated lymphoid tissue (GALT), VCAM1 and fibronectin, an extracellular matrix component.		Lymphoma-related	molecular marker
	makes complex with ITGA4 ((Peyer patches-specific homing receptor LPAM-1) - interacts with the cell surface adhesion molecules MADCAM1 which is normally expressed by the vascular endothelium of the gastrointestinal tract
	New markers for minimal residual disease detection in acute lymphoblastic leukemia.	21487112
ITGA4 (CD49D)	ITGA4 and ITB1/7, alpha-4/beta-1 is also known as VLA-4 - fibronectin receptors, also for VCAM1, with beta7 also for MADCAM1; fractalkine signalling of alpha.4 with beta-1, see above		Lymphoma-related	Drug target
	VLA-4 triggers homotypic aggregation for most VLA-4-positive leukocyte cell lines.
	Receptor for itronectin, cytotactin, fibronectin, fibrinogen, laminin, matrix metalloproteinase-2, osteopontin, osteomodulin, prothrombin, thrombospondin and vWF
	In complex with with integrin beta-3 - fractalkine signaling (23125415), also NRG1-ERBB signaling (20682778), binds also to FGF1/2 and FGF1/2 signaling (18441324, 28302677), also IGF1/2 signaling (19578119, 28873464). The complex with beta3 binds IL1B and essential for the IL1B signaling (290304309). ITGAV:ITGB6 or ITGAV:ITGB8 mediates TGF-beta1 activation (PubMed:15184403, PubMed:22278742, PubMe…
	CD49d (ITGA4) expression is a predictor of time to first treatment in patients with chronic lymphocytic leukaemia and mutated IGHV status.	26559905
	the effectiveness of blocking CD49d with anti-functional antibodies or small molecule inhibitors as a rational targeted approach to the treatment of acute leukemia in combination with chemotherapy.	29117236
	CD49d shows superior performance characteristics for flow cytometric prognostic testing in chronic lymphocytic leukemia/small lymphocytic lymphoma.	27221715
	Variable expression of CD49d antigen in B cell chronic lymphocytic leukemia is related to disease stages.	8709639
	Mantle cell lymphoma cells express high levels of CXCR4, CXCR5, and VLA-4 (CD49d): importance for interactions with the stromal microenvironment and specific targeting.	19228923
	Evaluating the performance of fibronectin 1 (FN1), integrin α4β1 (ITGA4), syndecan-2 (SDC2), and glycoprotein CD44 as the potential biomarkers of oral squamous cell carcinoma (OSCC).
HLA-DRB1	Possible Interaction Between Cigarette Smoking and HLA-DRB1 Variation in the Risk of Follicular Lymphoma.	28369180	Lymphoma-related
HLA-DRB4	The associations of HLA-A, -B, DRB1 alleles and haplotypes in Turkish lymphoma patients.	27063556
HLA-DRB3	[HLA DRB1*, DQB1*, DPA1*, and DPB1* and their association with the pathogenesis of leukemia in the population of Venezuela].	27560912
HLA-DPA1	Intravascular large B-cell lymphoma associated with silicone breast implant, HLA-DRB1*11:01, and HLA-DQB1*03:01 manifesting as macrophage activation syndrome and with severe neurological symptoms: a case report.	27634631
HLA-A	The Frequency of HLA-A, HLA-B, and HLA-DRB1 Alleles in Patients with Acute Lymphoblastic Leukemia in the Turkish Population: A Case-Control Study.	27095065
HLA-B	The association of HLA-class I and class II with Hodgkin's lymphoma in Iranian patients.
HLA-DRA	HLA Class I and II Diversity Contributes to the Etiologic Heterogeneity of Non-Hodgkin Lymphoma Subtypes.
SLC35A5	SLC39A6: a potential target for diagnosis and therapy of esophageal carcinoma.	26444413	Cancer-related	Drug target
	Solute Carrier Family 39 Member 6 Gene Promotes Aggressiveness of Esophageal Carcinoma Cells by Increasing Intracellular Levels of Zinc, Activating Phosphatidylinositol 3-Kinase Signaling, and Up-regulating Genes That Regulate Metastasis.	28209530
	miR-192, a prognostic indicator, targets the SLC39A6/SNAIL pathway to reduce tumor metastasis in human hepatocellular carcinoma.	26684241
	SLC39A6 affects esophageal squamous cell carcinoma survival.	23847371
	Genome-wide association study identifies common variants in SLC39A6 associated with length of survival in esophageal squamous-cell carcinoma.	23644492
	Co-expression analysis revealed PTCH1-3'UTR promoted cell migration and invasion by activating miR-101-3p/SLC39A6 axis in non-small cell lung cancer: implicating the novel function of PTCH1.	29435142
	SLC35A5 Protein-A Golgi Complex Member with Putative Nucleotide Sugar Transport Activity	30641943
	Whole-genome studies identify solute carrier transporters in cellular susceptibility to paclitaxel	22437668
	Transcriptome analysis reveals an altered expression profile of zinc transporters in colorectal cancer.	30129075
ICOSLG (CD275)	Expression of ICOSLG on mouse hematologic neoplasm cell lines and their influence on cytotoxicity in allogeneic mixed lymphocyte reactions.	21958057	Lymphoma-related
	Acts as a costimulatory signal for T-cell proliferation and cytokine secretion; induces also B-cell proliferation and differentiation into plasma cells.
	ICOSLG upregulation in CD37+ GCB-DLBCL,	27760757
SLAM	A combination of an anti-SLAMF6 antibody and ibrutinib efficiently abrogates expansion of chronic lymphocytic leukemia cells.	27029059	Lymphoma-related	Drug target
	T Cells Regulate Peripheral Naive Mature B Cell Survival by Cell-Cell Contact Mediated through SLAMF6 and SAP.	28904129
	New B-cell CD molecules.	20933010
	regulates human B-cell tolerance.	24373350
ATP6AP1	Blueprint of quartz crystal microbalance biosensor for early detection of breast cancer through salivary autoantibodies against ATP6AP1.	25461139	Lymphoma-related	glycosylation
	Loss-of-function mutations in ATP6AP1 and ATP6AP2 in granular cell tumors.	30166553
	Using a combination of discovery exome and extended targeted sequencing, we identified recurrent somatic mutations in RRAGC uniquely enriched in patients with follicular lymphoma (17%). More than half of the mutations preferentially co-occurred with mutations in ATP6V1B2 and ATP6AP1, which encode components of the vacuolar H(+)-ATP ATPase (V-ATPase) known to be necessary for amino acid-induced ac…	26691987
	ATP6AP1 deficiency causes an immunodeficiency with hepatopathy, cognitive impairment and abnormal protein glycosylation.	27231034
	Mutations in the X-linked ATP6AP2 cause a glycosylation disorder with autophagic defects.	29127204
GAL	α-Galactosidase A Genotype N215S Induces a Specific Cardiac Variant of Fabry Disease.	29018006
	CD1d(+) autoimmune B cells have reduced α-galactosidase A expression	25263549
	Fabry disease is an X-linked metabolic disorder due to a deficiency of alpha-galactosidase A (alpha-gal A; EC 3.2.1.22).	8755577
	Excessive stimulation of B cells with IFN-α altered the expression of enzymes that decreasing that of α-galactosidase A (α-galA)	29191573
LAMP1	Prognosis marker Diffuse Large B-cell Lymphoma.	30082222	Lymphoma-related	prognosis marker
	promotes T-cell lymphoblastic lymphoma progression	30922709
	prognosis	29085473; 27788920
	Regulation of melanoma metastasis	24845565
	carbohydrates on LAMP1 play a decisive role in dictating lung metastasis.	25614122
	Circ-LAMP1 promotes T-cell lymphoblastic lymphoma progression via acting as a ceRNA for miR-615-5p to regulate DDR2 expression.	30922709
	LAMP1 Overexpression Predicts for Poor Prognosis in Diffuse Large B-cell Lymphoma.	30082222
	Circ-LAMP1 promotes T-cell lymphoblastic lymphoma progression via acting as a ceRNA for miR-615-5p to regulate DDR2 expression.	30922709
ADAM10	Triptolide: An inhibitor of a disintegrin and metalloproteinase 10 (ADAM10) in cancer cells.	19783906	Lymphoam-related	Drug target
	Specific ADAM10 inhibitors localize in exosome-like vesicles released by Hodgkin lymphoma and stromal cells and prevent sheddase activity carried to bystander cells.	29721369
	ADAM10 new selective inhibitors reduce NKG2D ligand release sensitizing Hodgkin lymphoma cells to NKG2D-mediated killing.	27467923
	Tspan33 is Expressed in Transitional and Memory B Cells, but is not Responsible for High ADAM10Expression.	28449222
	Constitutive activation of metalloproteinase ADAM10 in mantle cell lymphoma promotes cell growth and activates the TNFα/NFκB pathway.	21441465
	How to exploit stress-related immunity against Hodgkin's lymphoma: Targeting ERp5 and ADAM sheddases.	24498565
	Discovery of a new selective inhibitor of A Disintegrin And Metalloprotease 10 (ADAM-10) able to reduce the shedding of NKG2D ligands in Hodgkin's lymphoma cell models.	26871660
	High ERp5/ADAM10 expression in lymph node microenvironment and impaired NKG2D ligands recognition in Hodgkin lymphomas.	22167753
	[Effect of ADAM10 Inhibitor GI254023X on Proliferation and Apoptosis of Acute T-Lymphoblastic Leukemia Jurkat Cells In Vitro and Its Possible Mechanisms].	26314424
PPP4R2	Deleted in Acute myeloid leukemia	29221109	Lymphoma-related
	Implications for the treatment of Chronic Lymphocytic Leukemia	31142279
SLC3A2 (CD98)	The receptor protein tyrosine phosphatase PTPRJ negatively modulates the CD98hc oncoprotein in lung cancer cells.	29805737	Cancer-related	cancer biomarker
	Ubiquitylation of CD98 limits cell proliferation and clonal expansion.	26493331
	SLC3A2, antigen of mAb 3G9, promotes migration and invasion by upregulating of mucins in gastric cancer.	29179459
	Dual Targeting of ERBB2/ERBB3 for the Treatment of SLC3A2-NRG1-Mediated Lung Cancer.	29959202
	SLC3A2 is upregulated in human osteosarcoma and promotes tumor growth through the PI3K/Akt signaling pathway.	28350098
	ZEB1 Promotes Chemoresistance to Cisplatin in Ovarian Cancer Cells by Suppressing SLC3A2.	30481785
	The multifunctional solute carrier 3A2 (SLC3A2) confers a poor prognosis in the highly proliferative breast cancer subtypes.	29545595
	Discovery of SLC3A2 cell membrane protein as a potential gastric cancer biomarker: implications in molecular imaging.	23116296
	CD98hc (SLC3A2) drives integrin-dependent renal cancer cell behavior.	24359579
	SLC3A2/CD98hc, autophagy and tumor radioresistance: a link confirmed.	31276435
	Genetic variations in SLC3A2/CD98 gene as prognosis predictors in non-small cell lung cancer.	24782339
	CD98hc (SLC3A2) loss protects against ras-driven tumorigenesis by modulating integrin-mediated mechanotransduction.	25267066
	CD98hc (SLC3A2), a novel marker in renal cell cancer.	19292886
	Cystine-glutamate transporter SLC7A11 in cancer chemosensitivity and chemoresistance.	16103098
	CD98hc (SLC3A2) mediates integrin signaling.	15625115
	CD98hc (SLC3A2) interaction with beta 1 integrins is required for transformation.	15485886
	CD98-Mediated Adhesive Signaling Enables the Establishment and Propagation of Acute Myelogenous Leukemia.	27908736
	Levels of expression of CAF7 (CD98) have prognostic significance in adult acute leukemia.	9585078
	Levels of CAF7 (CD98) expression correlate with the complete remission duration in childhood acute leukemia.	8632680
	When associated with LAPTM4B, the heterodimer formed by SLC3A2 and SLC7A5 is recruited to lysosomes to promote leucine uptake into these organelles, and thereby mediates mTORC1 activation	25998567
	CD98 is a potential target for ablating B cell clonal expansion and autoantibody in multiple sclerosis.	25002078
	CD98hc facilitates B cell proliferation and adaptive humoral immunity.
SLC39A14	The exon-level biomarker SLC39A14 has organ-confined cancer-specificity in colorectal cancer.	22173985	Cancer-related	Biomarker
	Decreased expression of SLC 39A14 is associated with tumor aggressiveness and biochemical recurrence of human prostate cancer.	27471394
	Alternative splicing of SLC39A14 in colorectal cancer is regulated by the Wnt pathway.	20938052
SLC17A5	glucuronic acid and free sialic acid transport
SLC1A5	Sodium-dependent neutral amino acid transport; accepts as substrates all neutral amino acids, including glutamine, asparagine, and branched-chain and aromatic amino acids, and excludes methylated, anionic, and cationic amino acids		Cancer-related
	Metformin inhibits PPARδ agonist-mediated tumor growth by reducing Glut1 and SLC1A5 expressions of cancer cells.	31150647
	Glutamine addiction activates polyglutamine-based nanocarriers delivering therapeutic siRNAs to orthotopic lung tumor mediated by glutamine transporter SLC1A5.	30149232
	Overexpression of SLC1a5 in lymph node metastases outperforms assessment in the primary as a negative prognosticator in non-small cell lung cancer.	29455869
	miR-137 regulates ferroptosis by targeting glutamine transporter SLC1A5 in melanoma.	29348676
	Inhibition of SLC1A5 sensitizes colorectal cancer to cetuximab.	29363109
	Regulation of SLC1A4 and SLC1A5 in Prostate Cancer-Response.	30385664
TSPAN3	Tetraspanin 3 Is Required for the Development and Propagation of Acute Myelogenous Leukemia.	26212080	Cancer-related
	Tumor suppressor miR-139-5p targets Tspan3 and regulates the progression of acute myeloid leukemia through the PI3K/Akt pathway.	30367526
SLAMF6(CD352)	SLAMF6 as a Regulator of Exhausted CD8+ T Cells in Cancer.	31315913	Cancer-related
JAG2	Jagged-2 (JAG2) enhances tumorigenicity and chemoresistance of colorectal cancer cells.	28881809	Cancer-related
	Mutual regulation of JAG2 and PRAF2 promotes migration and invasion of colorectal cancer cells uncoupled from epithelial-mesenchymal transition.	31198409
	Induction of ectopic Myc target gene JAG2 augments hypoxic growth and tumorigenesis in a human B-cell model.	20133585
GLT8D1	GLT8D1 overexpression as a novel prognostic biomarker in human cutaneous melanoma.		Cancer-related	prognostic biomarker
CNNM4	CNNM4-dependent Mg2+ efflux suppresses tumor progression.	25347473	Cancer-related
	Cnnm4 deficiency suppresses Ca2+ signaling and promotes cell proliferation in the colon epithelia	30670776
BTN3A3	Plays a role in T-cell responses in the adaptive immune response.	22767497	Cancer-related
	enhances breast cancer stemness	30858559
PTPRJ	Tyrosine phosphatase which dephosphorylates or contributes to the dephosphorylation of CTNND1, FLT3, PDGFRB, MET, RET (variant MEN2A), KDR, LYN, SRC, MAPK1, MAPK3, EGFR, TJP1, OCLN, PIK3R1 and PIK3R2		Cancer-related	Drug target
	Tumor Suppressor PTPRJ Is a Target of miR-155 in Colorectal Cancer.
	The protein tyrosine phosphatase DEP-1/PTPRJ promotes breast cancer cell invasion and metastasis.
	Discovery of PTPRJ agonist peptides that effectively inhibit in vitro cancer cell proliferation and tube formation.
	Blockage of PTPRJ promotes cell growth and resistance to 5-FU through activation of JAK1/STAT3 in the cervical carcinoma cell line C33A.
	The receptor protein tyrosine phosphatase PTPRJ negatively modulates the CD98hc oncoprotein in lung cancer cells.
	MicroRNA-328 enhances cellular motility through posttranscriptional regulation of PTPRJ in human hepatocellular carcinoma.
CALCRL	The neuropeptide receptor calcitonin receptor-like (CALCRL) is a potential therapeutic target in acute myeloid leukemia.	31182782	Cancer-related	therapeutic target
TFRC	TFR1 has been verified to be abnormally expressed in various cancers. Some experimental and clinical drugs and antibodies targeting TFR1 have showed strong anti-tumor effects, herein TFR1 probably become a potential molecular target for diagnosis and treatment for cancer therapy.	30034931	Cancer-related	Drug target
	The TFRC genotype also showed an ethnicity-specific association, with increased risk observed in non-Hispanic Whites	25085015
PPT1	PPT1, a new regulator of autophagy in cancer	29404393	Cancer-related	Drug target
	PPT1 Promotes Tumor Growth	30442709
	Removes thioester-linked fatty acyl groups such as palmitate from modified cysteine residues in proteins or peptides during lysosomal degradation. Prefers acyl chain lengths of 14 to 18 carbons (PubMed:8816748).
	PPT1 Promotes Tumor Growth and Is the Molecular Target of Chloroquine Derivatives in Cancer.	30442709
	Dimeric quinacrines as chemical tools to identify PPT1, a new regulator of autophagy in cancercells.	29404393
SPOCK2	SPOCK2 Affects the Biological Behavior of Endometrial Cancer Cells by Regulation of MT1-MMP and MMP2.	30832559	Cancer-related
	Upregulation of SPOCK2 inhibits the invasion and migration of prostate cancer cells by regulating the MT1-MMP/MMP2 pathway.	31338255
	Epigenetic inactivation of SPOCK2 in the malignant transformation of ovarian endometriosis	22333230
RNASET2	Human recombinant RNASET2: A potential anti-cancer drug.	27014725	Cancer-related	Drug target
	RNASET2 silencing affects miRNAs and target gene expression pattern in a human ovarian cancercell model.	27840914
	Human recombinant truncated RNASET2, devoid of RNase activity; A potential cancer therapeutic agent.	25426551
	Pleiotropic modes of action in tumor cells of RNASET2, an evolutionary highly conserved extracellular RNase.	25797262
	A Cell-Autonomous Oncosuppressive Role of Human RNASET2 Affecting ECM-Mediated Oncogenic Signaling.	30813308
	RNASET2-deficient leukoencephalopathy mimicking congenital CMV infection and Aicardi-Goutieres syndrome: a case report with a novel pathogenic variant.	31349848
	Molecular signature induced by RNASET2, a tumor antagonizing gene, in ovarian cancer cells.	21646684
	New insights into hypoxia-related mechanisms involved in different microvascular patterns of bronchopulmonary carcinoids and poorly differentiated neuroendocrine carcinomas. Role of ribonuclease T2 (RNASET2) and HIF-1α.	29763721
	RNASET2--an autoantigen in anaplastic large cell lymphoma identified by protein array analysis.	22732457
	RNASET2 as a tumor antagonizing gene in a melanoma cancer model.	18543608
	Tumor and metastasis suppression by the human RNASET2 gene.	15809705
	Comparison of the baculovirus-insect cell and Pichia pastoris heterologous systems for the expression of the human tumor suppressor protein RNASET2.	21446958
	A recombinant human RNASET2 glycoprotein with antitumorigenic and antiangiogenic characteristics: expression, purification, and characterization.	17109444
	Characterization of RNASET2, the first human member of the Rh/T2/S family of glycoproteins.	16620762
TXNDC16 (ERp90)	Secretion and immunogenicity of the meningioma-associated antigen TXNDC16.
STS	Inhibition of steryl sulfatase activity in LNCaP human prostate cancer cells.	12231117	Ccancer-related
	Steroid sulfatase inhibitors: promising new therapy for breast cancer.	23905452
	Steroid sulfatase inhibition success and limitation in breast cancer clinical assays: An underlying mechanism.	29803725
	Estrogen Activation by Steroid Sulfatase Increases Colorectal Cancer Proliferation via GPER.	28945888
	The Role of Steroid Sulfatase as a Prognostic Factor in Patients with Endometrial Cancer.	26996578
	Irosustat: a first-generation steroid sulfatase inhibitor in breast cancer.	21342037
	Steroid sulfatase: a new target for the endocrine therapy of breast cancer.	17470679
	Reduced expression of steroid sulfatase in primary colorectal cancer.	PMID:
PPIB	Cyclophilin B induces chemoresistance by degrading wild-type p53 via interaction with MDM2 in colorectal cancer.	29876924	Cancer-related
	Cyclophilin B expression is associated with in vitro radioresistance and clinical outcome after radiotherapy.
ASPH	be overexpressed in different cancer types,as a tumor biomarker and therapeutic target	30179586; 27981247; 29764768 ; 28714949 ; 30768955; 24954865 ; 22245894	Cancer-related
	promote metastasis, inhibit cell proliferation, modulates cellular senescence,promotes cholangiocarcinoma progression,disrupts mitochondrial DNA stability and function,induces epitope-specific T cell responses in cancer	29736205; 29764768; 26683595; 29733964
	promotes a malignant pancreatic cellular phenotype	25483102
CANT1	Therapeutic Efficacy	28330694	Cancer-related
	The androgen-regulated Calcium-Activated Nucleotidase 1 (CANT1) is commonly overexpressed in prostate cancer and is tumor-biologically relevant in vitro.	21435463
	Calcium-activated nucleotidase 1 silencing inhibits proliferation, migration, and invasion in human clear cell renal cell carcinoma.	31102300
	involved in proteoglycan synthesis	22539336
CLEC2D	Overexpression of LLT1 (OCIL, CLEC2D) on prostate cancer cells inhibits NK cell-mediated killing through LLT1-NKRP1A (CD161) interaction.	27626681	Cancer-related
	Receptor for KLRB1 that protects target cells against natural killer cell-mediated lysis
	Blocking LLT1 (CLEC2D, OCIL)-NKRP1A (CD161) interaction enhances natural killer cell-mediated lysis of triple-negative breast cancer cells.	30034942
	Characterization of alternatively spliced transcript variants of CLEC2D gene.	20843815
PLD3	MiR-30e suppresses proliferation of hepatoma cells via targeting prolyl 4-hydroxylase subunit alpha-1 (P4HA1) mRNA.	26966067	Cancer-related
	P4HA1/HIF1α feedback loop drives the glycolytic and malignant phenotypes of pancreatic cancer.	31239153
	The miR-124-prolyl hydroxylase P4HA1-MMP1 axis plays a critical role in prostate cancer progression.	25115393
	MiR-122 inhibits epithelial mesenchymal transition by regulating P4HA1 in ovarian cancer cells.	30136751
	P4HA1 is a new regulator of the HIF-1 pathway in breast cancer.	31225497
MIA3	MicroRNA-222 influences migration and invasion through MIA3 in colorectal cancer.	28855850	Cancer-related
ITPR1	ITPR1 protects renal cancer cells against natural killer cells by inducing autophagy.	25297632	Cancer-related
	Ai-lncRNA EGOT enhancing autophagy sensitizes paclitaxel cytotoxicity via upregulation of ITPR1expression by RNA-RNA and RNA-protein interactions in human cancer.	30999914
	ITPR1 autoimmunity: Frequency, neurologic phenotype, and cancer association.	29379822
	The autophagy sensor ITPR1 protects renal carcinoma cells from NK-mediated killing.	25714778
HYOU1 (CBP-140)	HYOU1, Regulated by LPLUNC1, Is Up-Regulated in Nasopharyngeal Carcinoma and Associated with Poor Prognosis.	26918051	Cancer-related	Prognosis
	HYOU1/Orp150 expression in breast cancer.	17968289
	HYOU1 promotes cell growth and metastasis via activating PI3K/AKT signaling in epithelial ovarian cancer and predicts poor prognosis.	31173282
P3H1	The prolyl 3-hydroxylases P3H2 and P3H3 are novel targets for epigenetic silencing in breast cancer.	19436308	Cancer-related	Drug target
LAMP2	Up-Regulated Expression of LAMP2	27627761	Cancer-related
	Lamp2 inhibits epithelial-mesenchymal transition	30100986
	High expression of LAMP2 predicts poor prognosis in patients	28453465
	LAMP2 expression dictates azacytidine response and prognosis in MDS/AML.	30607021
GUSB	Regulation and expression of aberrant methylation on irinotecan metabolic genes CES2, UGT1A1 and GUSB in the in-vitro cultured colorectal cancer cells.	24439671
MAN2B1	-D-mannosidase enzyme activity is very high in the promyelocytic leukaemia cell lines HL60 and NB4	21521175
M6PR	Cation-dependent mannose-6-phosphate receptor expression and distribution are influenced by estradiol in MCF-7 breast cancer cells.	30086159	Cancer-related	Drug target
	Biosynthesis and endocytosis of lysosomal enzymes in human colon carcinoma SW 1116 cells: impaired internalization of plasma membrane-associated cation-independent mannose 6-phosphate receptor.	1326252
	Mannose-6-phosphate receptor: a target for theranostics of prostate cancer.	25802144
NUP210	Nuclear pore protein gp210 is essential for viability in HeLa cells and Caenorhabditis elegans	14517331	Cancer-related
	Identification of Epigenetic Biomarkers of Lung Adenocarcinoma through Multi-Omics Data Analysis	27042856
TTN	Aggregate analysis based on TCGA: TTN missense mutation correlates with favorable prognosis in lung squamous cell carcinoma.	30810839	Cancer-related
ITGAV	IL-32γ suppresses lung cancer stem cell growth via inhibition of ITGAV-mediated STAT5 pathway.	31263095	Cancer-related
	Ilex hainanensis Merr targets ITGAV to suppress the proliferation and metastasis of osteosarcoma cells.	31239718
	Inhibition of skin carcinogenesis by suppression of NF-κB dependent ITGAV and TIMP-1 expression in IL-32γ overexpressed condition.	30486830
	Reporting on Two Novel Fusions, DYSF-ALK and ITGAV-ALK, Coexisting in One Patient with Adenocarcinoma of Lung, Sensitive to Crizotinib.	29472060
LMBRD1	A novel translocation (6;20)(q13;q12) in acute myeloid leukemia likely results in LMBRD1-CHD6 fusion.	24844365
	Identification of a putative lysosomal cobalamin exporter altered in the cblF defect of vitamin B12 metabolism	19136951
	Mice Deficient in Nucleoporin Nup210 Develop Peripheral T Cell Alterations.
LIPA	Our case study demonstrates that hepatomegaly is an inconstant feature, even in CESD patients compound heterozygous for a Wolman mutation which results in complete loss of human lysosomal acid lipase/cholesteryl ester hydrolase (hLAL) enzymic activity.	10735626
GNPTAB	Acid hydrolases utilize a carbohydrate-dependent mechanism for lysosomal targeting. These hydrolases acquire a mannose 6-phosphate tag by the action of the GlcNAc-1-phosphotransferase enzyme, allowing them to bind receptors and traffic to endosomes. Loss of GlcNAc-1-phosphotransferase results in hydrolase hypersecretion and profound lysosomal storage.	28724630
LMAN2 (VIP36)	Six hub genes were identified and verified in the TCGA database, including five up-regulated genes, POLR2L, POLR2C, POLR2F, APRT, and LMAN2, and a down-regulated gene, NFKB2 gastric cancer..	29693274
TMEM199	TMEM199 Deficiency Is a Disorder of Golgi Homeostasis Characterized by Elevated Aminotransferases, Alkaline Phosphatase, and Cholesterol and Abnormal Glycosylation.	26833330	glycosylation
	Three unreported cases of TMEM199-CDG, a rare genetic liver disease with abnormal glycosylation.	29321044
TMEM245	The pathogenesis of colorectal cancer (CRC) is poorly understood. MicroRNA (miR)-32 upregulation in CRC tissues was previously reported, where it increased the proliferation, migration and invasion, and reduced apoptosis of CRC cells by inhibiting the expression of phosphatase and tensin homolog (PTEN). However, the mechanism underlying miR-32 upregulation remains unknown. miR-32 is an intronic m…	30881496
TTC17	Circ-TTC17 Promotes Proliferation and Migration of Esophageal Squamous Cell Carcinoma.	30519852
	in breast cancer cells SK1 KD led to downregulation of NSUN2, NFATC3, CDK2, and G3BP2 and upregulation of GTF2B, TTC17, and RAB23.	PMC6445839
	wo newly identified factors, TTC17and CCDC157, localized along the secretory pathway and were found to interact with resident proteins of ER-Golgi membranes. In addition, we uncovered that upon TTC17 knockdown, the polarized organization of Golgi cisternae was altered, creating glycosylation defects, and that CCDC157 is an important factor for the fusion of transport carriers to Golgi membranes.
SORL1	SORLA regulates endosomal trafficking and oncogenic fitness of HER2	31138794
GLG1 (MG-160)	Binds fibroblast growth factor and E-selectin (cell-adhesion lectin on endothelial cells mediating the binding of neutrophils)	8985126
	Golgi localization	2355176
Kiaa1107	SV budding from endosomes	29262337
stxbp1	IN the litearture there are described blood abnormalities associated with mutations in stxbp2 only	23100279; 20823128
SPPL2B	with regard to reported overlapping substrate spectra of SPPL2a and its close homologue, SPPL2b, we investigated the role of SPPL2b in CD74 NTF proteolysis and its impact on B and dendritic cell homeostasis. In heterologous expression experiments, SPPL2b was found to cleave CD74 NTF with an efficiency similar to that of SPPL2a. For in vivo analysis, SPPL2b single-deficient and SPPL2a/SPPL2b doubl…	24492962
NEB	This giant muscle protein may be involved in maintaining the structural integrity of sarcomeres and the membrane system associated with the myofibrils. Binds and stabilize F-actin.
TMEM248	Unknown and less characterized, located on cell surface
RNF149	E3 ubiquitin-protein ligase. Ubiquitinates BRAF, inducing its proteasomal degradation. cell surface protein
RSPH10B2	Unknown and less characterized,cell surface protein
PODXL2	Cell sruface and adhesion molecules,Acts as a ligand for vascular selectins. Mediates rapid rolling of leukocytes over vascular surfaces through high affinity divalent cation-dependent interactions with E-, P- and L-selectins.
PKD2L2	Acts as a ligand for vascular selectins. Mediates rapid rolling of leukocytes over vascular surfaces through high affinity divalent cation-dependent interactions with E-, P- and L-selectins. cell surface protein	18606703
NOMO3	May antagonize Nodal signaling, cell surface proteins.
MEGF8	Receptors, cell surface protein
GXYLT1	elongates the O-linked glucose attached to EGF-like repeats, Glycosyltransferase, cell surface protein
NDUFA12	Inner mitochondrial membrane,Complex I
COX6B1	Inner mitochondrial membrane, Complex IV
GNS	N-acetylglucosamine-6-sulfatase, lysosome
PNPLA6	Carboxylic Ester Hydrolases, ER
PIGN	Glycosyltransferase, ER
TMTC4	Protein O-mannosyl-transferase TMTC4, ER
UGGT2	Glycosyltransferase, ER
SUMF1	Oxidoreductases, ER
LNPEP	Aminopeptidase, cell surface
ATRN	Involved in the initial immune cell clustering during inflammatory response, Receptor
COCH	Receptors and transporters, cell surface or secreted
SLC7A1	Transporter, cell surface
IGHD	Constant region of immunoglobulin heavy chains. Immunoglobulins, also known as antibodies, are membrane-bound or secreted glycoproteins produced by B lymphocytes.
EDEM1	targets misfolded glycoproteins for degradation in an N-glycan-independent manner
ERLIN1	ER
TMEM199	TMEM199 Deficiency Is a Disorder of Golgi Homeostasis Characterized by Elevated Aminotransferases, Alkaline Phosphatase, and Cholesterol and Abnormal Glycosylation.	26833330

## Sheet: Sunburst
Category 1	Category 2	Category 3	Category 4	Category 5	Category 7	# Genes/category
Lymphoma-related proteins	Cell surface and adhesion molecules	CD molecules	Integrin-related	Integrin	cell-extracellular matrix (ECM) adhesion	5
Lymphoma-related proteins	Cell surface and adhesion molecules	CD molecules	Integrin-related	Integrin αL/β-2 ligand		2
Lymphoma-related proteins	Cell surface and adhesion molecules	CD molecules	Receptor	TNF		1
Lymphoma-related proteins	Cell surface and adhesion molecules	CD molecules	Receptor			1
Lymphoma-related proteins	Cell surface and adhesion molecules	CD molecules				7
Lymphoma-related proteins	Cell surface and adhesion molecules	CD molecules	Stimulatory regulation effect			1
Lymphoma-related proteins	Cell surface and adhesion molecules	CD molecules	Hydrolase	Phosphatase	Protein-Tyr phosphatase	1
Lymphoma-related proteins	Cell surface and adhesion molecules	CD molecules				1
Lymphoma-related proteins	Cell surface and adhesion molecules	Immunoglobulin	BCR			4
Lymphoma-related proteins	Cell surface and adhesion molecules	MHC molecules	MHC II molecules			7
Lymphoma-related proteins	Enzymes	Hydrolases	Peptidases	Metalloendopeptidases	TNFα/NFκB pathway activation	1
Lymphoma-related proteins	Enzymes	Lyases	Ribunucleases			1
Lymphoma-related proteins	Enzymes	ATPase activity	mTORC1 activation			1
Lymphoma-related proteins	Receptors and transporters	Receptors				1
Lymphoma-related proteins	Endo-lysosomal proteins					1
Putative drug target in other cancers	Enzymes	Hydrolases	Thioester Hydrolases			1
Putative drug target in other cancers	Enzymes	Hydrolases	Carboxylic Ester Hydrolases			1
Putative drug target in other cancers	Enzymes	Hydrolases	Acting on acid anhydrides	In Phosphorus-Containing Anhydrides		1
Putative drug target in other cancers	Enzymes	Hydrolases	Phosphatases			1
Putative drug target in other cancers	Enzymes	Hydrolases	Phosphoric Diester Hydrolases			1
Putative drug target in other cancers	Enzymes	Cis-trans isomerases	Peptidylprolyl isomerase			1
Putative drug target in other cancers	Enzymes	Oxidoreductases				1
Putative drug target in other cancers	Enzymes	Oxidoreductases				1
Putative drug target in other cancers	Enzymes	Transferases	Glycosyltransferase			1
Putative drug target in other cancers	Enzymes	Transferases	Phosphotransferases	Protein Ser/Thr kinases		1
Putative drug target in other cancers	Receptors and transporters	Receptors	Endosomal			1
Putative drug target in other cancers	Receptors and transporters	Receptors				5
Putative drug target in other cancers	Receptors and transporters	Transporters	Metal ion transporter			2
Putative drug target in other cancers	Receptors and transporters	Transporters	Metal ion transport	Zinc		1
Putative drug target in other cancers	Receptors and transporters	Transporters	Amino acid transporter	mTORC1 activation		1
Putative drug target in other cancers	Receptors and transporters	Transporters	Amino acid transporter	neutral		1
Putative drug target in other cancers	Receptors and transporters	Transporters	Nucleotide sugar transport			1
Putative drug target in other cancers	Nuclear proteins	Cell viability				1
Putative drug target in other cancers	Others	Signaling molecules	NOTCH signaling			1
Putative drug target in other cancers	Others	Unknown and less characterized proteins				2
Putative drug target in other cancers	Protein folding and degradation	Chaperone				1
Putative drug target in other cancers	Endo-lysosomal proteins					1
Putative drug target in other cancers	ER					1
Putative drug target in other cancers	Cell surface and adhesion molecules	CD molecules	Integrin-related	Integrin	cell-extracellular matrix (ECM) adhesion	1
Enzymes	Glycosylases	Glycosidases				3
Enzymes	Hydrolases	Carboxylic Ester Hydrolases				2
Enzymes	Hydrolases	Peptidases	Aminopeptidase			1
Enzymes	Hydrolases	Peptidases	Aspartic endopeptidase			1
Enzymes	Hydrolases	Phosphatases	Protein Ser/Thr Phosphatase	Regulatory subunit		1
Enzymes	Hydrolases	Phosphatases				1
Enzymes	Hydrolases	Sulfuric Ester Hydrolases				1
Enzymes	Oxidoreductases					1
Enzymes	Transferases	Glycosyltransferase				3
Enzymes	Transferases	Glycosyltransferases	Hexosyltransferases			1
Enzymes	Transferases	Phosphotransferases				1
Receptors and transporters	Receptors					4
Receptors and transporters	Transporters	Acidic sugars transport				1
Receptors and transporters	Transporters	Amino acid transport	cationic			1
Receptors and transporters	Transporters	Metal ion transporter	Ca			1
Receptors and transporters	Transporters	VitB12				1
Others	Protein folding and degradation	enzymes	E3 ubiquitin-protein ligase			1
Others	ER	ERAD pathway				2
Others	ER					1
Others	Golgi apparatus					1
Others	Mitochondrial proteins	Inner mitochondrial membrane	Complex I			1
Others	Mitochondrial proteins	Inner mitochondrial membrane	Complex IV			1
Others	Cytoskeleton and associated proteins					1
Others	Unknown and less characterized proteins	Regulatory factor				1
Others	Unknown and less characterized proteins					4
Others	Signaling molecules	Nodal signaling				1
Others	Trafficking proteins	Endocytosis-related				1
Others	Trafficking proteins	high-mannose-containing glycoprotein sorting				1
Others	Trafficking proteins	SNARE-binding proteins				1
Others	Cell sruface and adhesion molecules	Adhesion molecules				1
Others	Cell surface and adhesion molecules	CD molecules				1
